# Supplementary material for: Climate Change and the Evolution and Fate of the Tangier Islands of Chesapeake Bay, USA
Source: PubMed Central journal article supplement (PMC4675185; doi:10.1038/srep17890), 2015-12-10
Supplement: srep17890-s1.pdf [file srep17890-s1.pdf]

**Title: Climate Change and the Evolution and Fate of the Tangier Islands of Chesapeake Bay, USA**

**Authors: corresponding: David M. Schulte, contributing: Karin M. Dridge, Mark H. Hudgins**

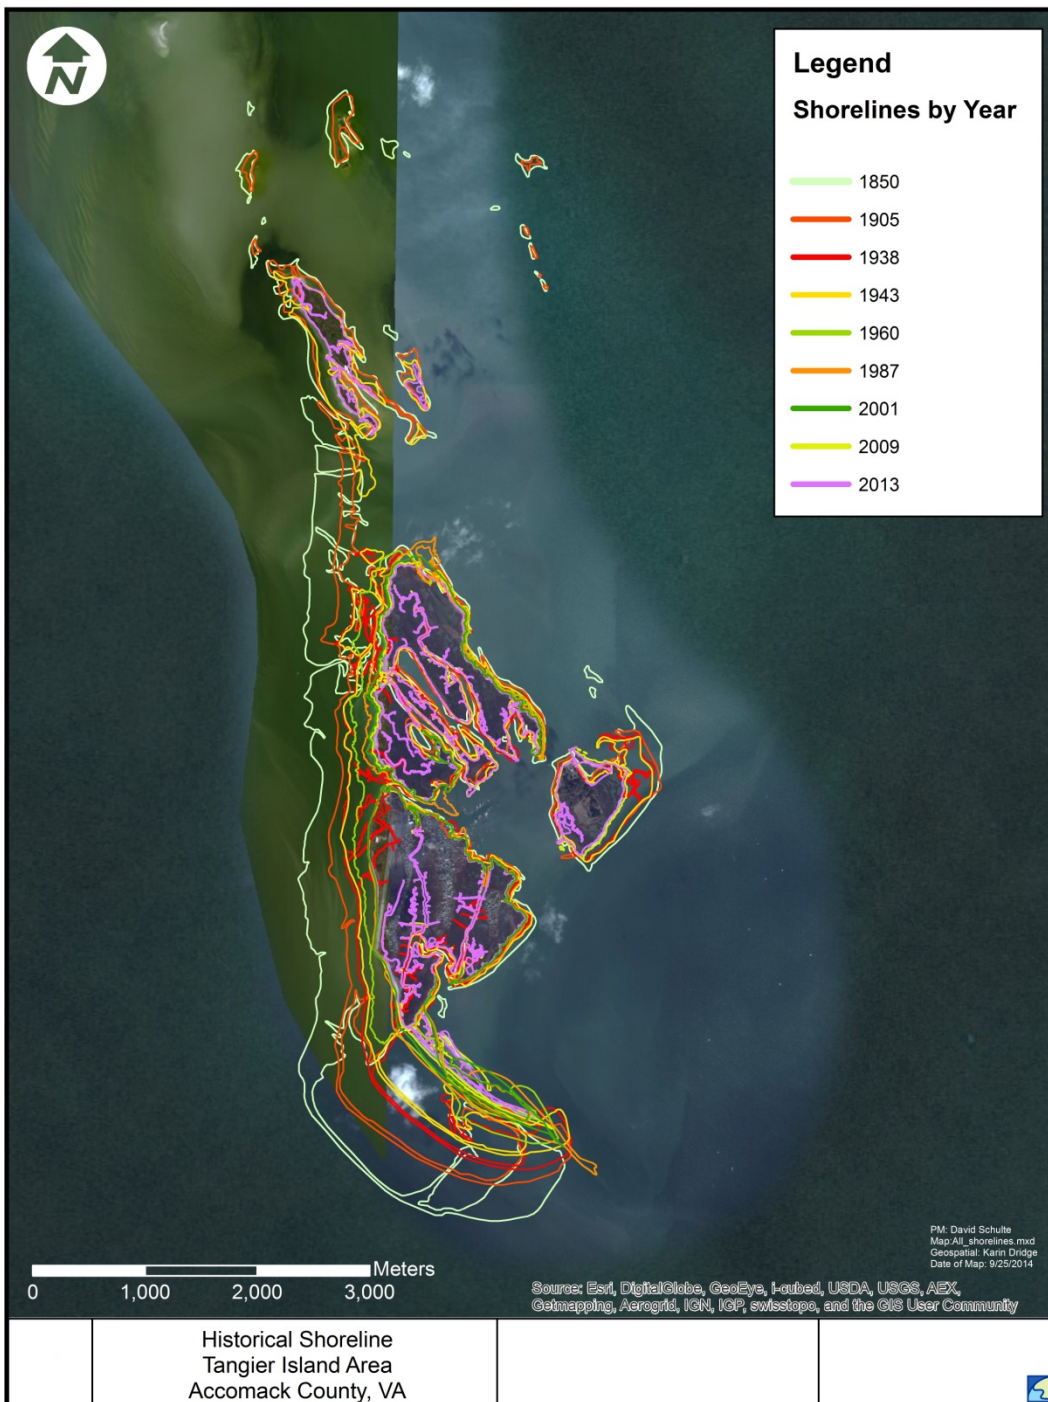

Supplementary Figure 1. Historic shorelines over time of the Tangier Islands, Virginia, Chesapeake Bay USA. Source: Esri, DigitalGlobe, GeoEye, Earthstar Geographics, CNES/Airbus DS, USDA, AEX,

Getmapping, Aerogrid, IGN, IGP, swisstopo, and the GIS User Community. For more information on this map, including the terms of use, visit: [http://goto.arcgisonline.com/maps/World\\_Imagery](http://goto.arcgisonline.com/maps/World_Imagery).

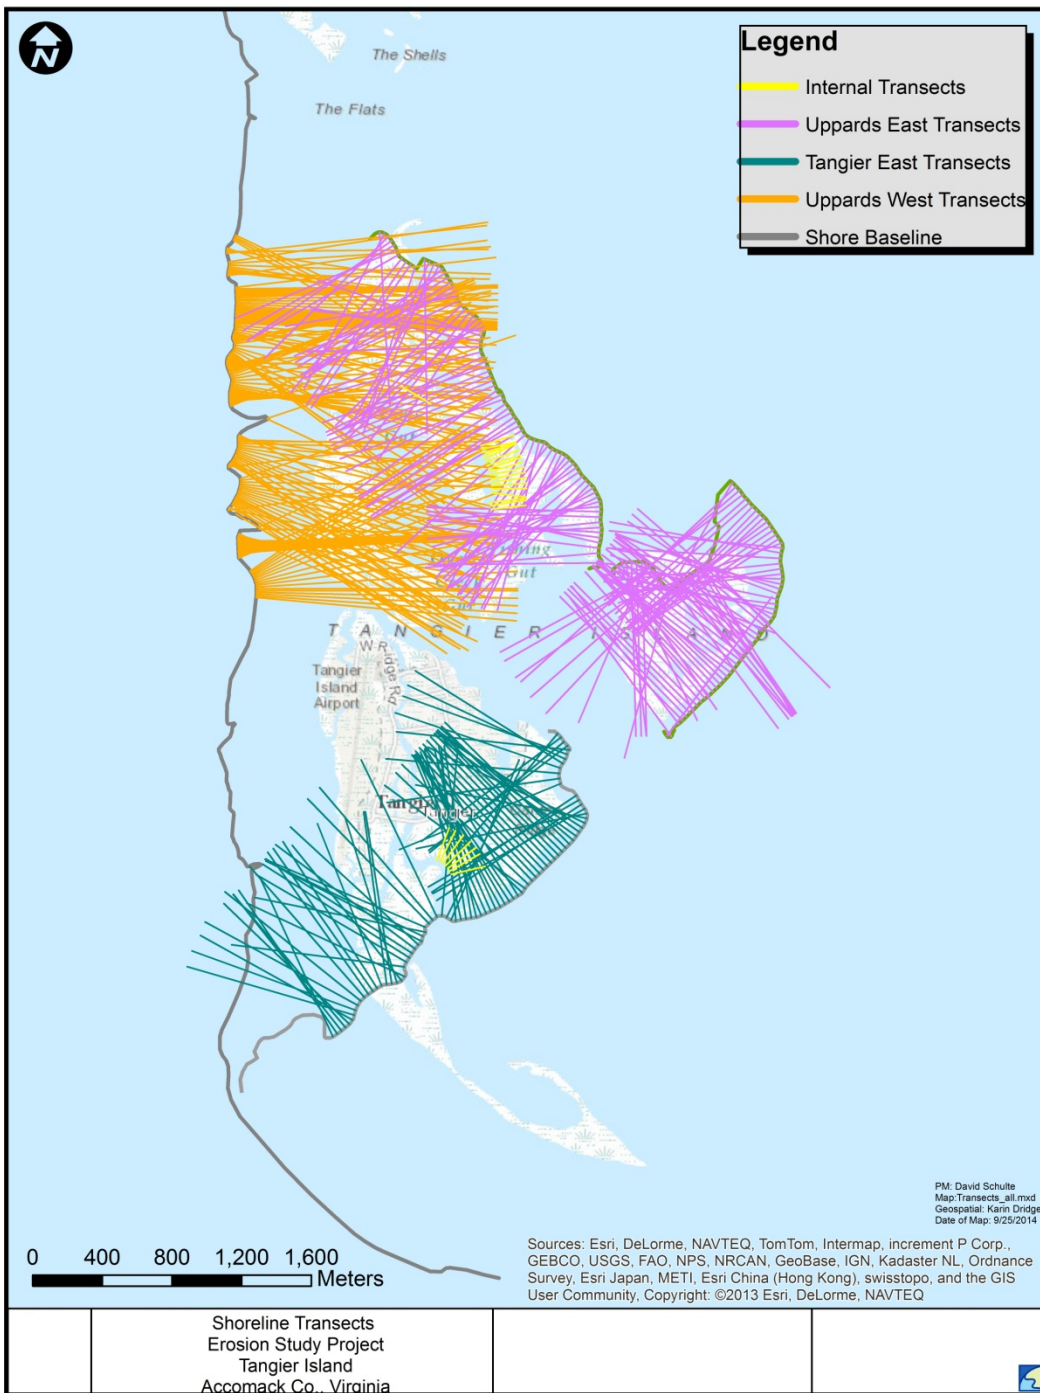

Supplementary Figure 2. Shoreline transects used to determine historic land shoreline loss rates over time. Map created using ESRI ArcGIS, ArcMap 10.1.

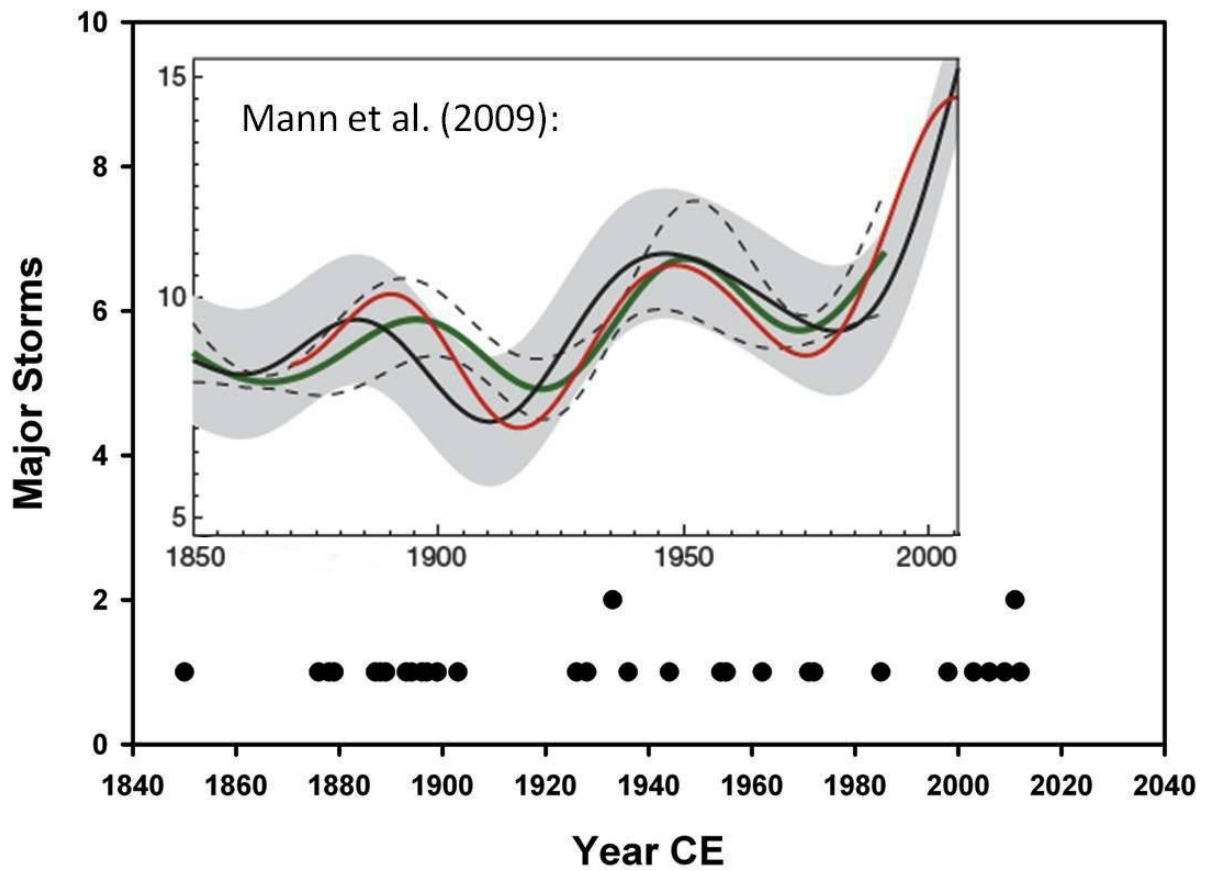

Supplementary Figure 3. Major storms in the local region of the Tangier Islands, indicated as black circles. They follow a general pattern observed in the North Atlantic by Mann et al. 2009.

SF2 Reference:

Mann, M. E., Woodruff, J. D., Donnelly, J. P., & Zhang, Z. Atlantic hurricanes and climate over the past 1,500 years. *Nature*. **460**, 880-883 (2009).

| SLR Scenario | Island  | Regression                 | Best-Fit Equation                                            | $r^2$ | $p$                                              |
|--------------|---------|----------------------------|--------------------------------------------------------------|-------|--------------------------------------------------|
| Low          | Goose   | $f = y + ax$               | $y = 1160.1508 - 0.5687x$                                    | 0.99  | $y < 0.0001, a < 0.0001$                         |
| Low          | Uppards | $f = y + ax$               | $y = 2394.3311 - 1.1326x$                                    | 0.99  | $y < 0.0001, a < 0.0001$                         |
| Low          | Taniger | $f = y + ax$               | $y = 3627.3598 - 1.7131x$                                    | 0.99  | $y < 0.0001, a < 0.0001$                         |
| Mid          | Goose   | $f = y + ax + bx^2$        | $y = 3152.8223 - 2.6069x + 0.0005x^2$                        | 0.99  | $y = 0.0035, a = 0.0114, b = 0.035$              |
| Mid          | Uppards | $f = y + ax$               | $y = 2465.3982 - 1.1697x$                                    | 0.99  | $y < 0.0001, a < 0.0001$                         |
| Mid          | Taniger | $f = y + ax$               | $y = 3740.2302 - 1.772x$                                     | 0.99  | $y < 0.0001, a < 0.0001$                         |
| High         | Goose   | $f = y + ax + bx^2$        | $y = 3972.5593 - 3.4514x + 0.0007x^2$                        | 0.99  | $y = 0.0014, a = 0.0039, b = 0.0105$             |
| High         | Uppards | $f = y + ax + bx^2 + cx^3$ | $y = 199766.2418 - 307.8088x - 0.1588x^2 - 2.786e^{-005}x^3$ | 0.99  | $y = 0.0432, a = 0.0428, b = 0.0415, c = 0.0397$ |
| High         | Taniger | $f = y + ax$               | $y = 4120.2245 - 1.9704x$                                    | 0.98  | $y < 0.0001, a < 0.0001$                         |

**Supplementary Table 1. Best-fit regression equations used for low, mid and high SLR scenarios for Goose, Uppards and Tangier Islands.**
